# Supplementary material for: Biological fluorination from the sea: discovery of a SAM-dependent nucleophilic fluorinating enzyme from the marine-derived bacterium Streptomyces xinghaiensis NRRL B24674
Source: Royal Society of Chemistry journal article supplement (doi:10.1039/c6ra00100a), 2016-01-01
Supplement: c6ra00100a1.pdf [file c6ra00100a1.pdf]

## Electronic Supporting Information

### Biological fluorination from the sea: Discovery of a SAM-dependent nucleophilic fluorinating enzyme from the marine-derived bacterium *Streptomyces xinghaiensis* NRRL B24674

Long Ma<sup>a,b,c</sup>, Yufeng Li<sup>b,c</sup>, Lingpei Meng<sup>b,c</sup>, Hai Deng<sup>d</sup>, Yuyin Li<sup>b,c</sup>, Qiang Zhang<sup>e</sup>, Aipo Diao<sup>b,c</sup>

<sup>a</sup>Biomolecular Sciences Research Complex, EaStCHEM School of Chemistry, University of St Andrews, Fife KY16 9ST, United Kingdom. E-mail: lm228@st.andrews.ac.uk

<sup>b</sup>Key Laboratory of Industrial Fermentation Microbiology, Ministry of Education, School of Biotechnology, Tianjin University of Science & Technology, Tianjin 300457, China. Fax: +86 22 60602298; Tel: +86 22 60602948; E-mail: malong@tust.edu.cn

<sup>c</sup>Tianjin Key Laboratory of Industry Microbiology, School of Biotechnology, Tianjin University of Science & Technology, Tianjin 300457, China. Tel: +0133 446 7254

<sup>d</sup>Marine Biodiscovery Centre, Department of Chemistry, University of Aberdeen, Meston Walk, Aberdeen AB24 3UE, United Kingdom.

<sup>e</sup>Tianjin 3<sup>rd</sup> center hospital. Tianjin 300170, China.

#### 1. Plasmid construction

Gene sequence of the fluorinase was deduced from the whole genome of *Streptomyces xinghaiensis* NRRL B-24674. The *Streptomyces xinghaiensis* fluorinase (*flA*) and other fluorinase genes were all codon-optimised and synthesised by Shanghai Generay Biotech Co., Ltd. The synthetic gene *flA* was then cloned into a pET-28a(+) vector with two restriction sites EcoRI/HindIII located in the upstream and downstream of *flA* gene respectively.

#### 2. Site-directed mutagenesis

The overlap PCR method was used to introduce D16E, Y77A, T80S, F156A, S158A mutants as previously described with slight modifications.<sup>1</sup> The amplified PCR product was then cloned into the pET-28a(+) vector to generate pET-28a(+)-*flA* mutants respectively, which were all sequenced and confirmed by Beijing BGI company. The primers used in site-directed mutagenesis were all listed in Tab S2.

#### 3. Protein expression and purification

The plasmids were transformed into *E. coli* BL21(DE3) using the heat shock method. Simply, a mixture of chemically competent bacteria and plasmid DNA was placed at 42°C for 90 s and then placed back on ice. *E. coli* BL21(DE3) cells, transformed with the synthetic fluorinase plasmids were grown in Luria broth containing 100 mg/mL kanamycin at 37°C until the cell density reached an absorbance at ~0.6 at 600 nm. The culture was then cooled down on ice for 30 min. Over-expression was induced with 0.01 mM isopropylthiogalactoside (IPTG) and continued the incubation at 16°C for around 30 h. Cells were harvested by centrifugation at 6000 × g for 15 min at 4°C. The cell pellets were re-suspended in a lysis buffer (25 mM Tris-HCl, pH 8.0, 300 mM NaCl, 2.5 mM β-mercaptoethanol) and lysed by sonication. Cell debris was removed by centrifugation (8000 × g, 20 min, 4°C). The supernatant was filtered and loaded onto a 5 mL pre-packed His-Trap FF column (GE Healthcare), which was connected to a AKTA Purifier (GE Healthcare). Protein-bound Ni<sup>2+</sup> beads were washed with washing buffer (25 mM Tris-HCl, pH 8.0, 300 mM NaCl, 50 mM imidazole) and eluted with elution buffer (25 mM Tris-HCl, pH 8.0, 300 mM NaCl, 200 mM imidazole). The eluted protein was dialysed against buffer (50 mM Tris-HCl, pH 7.0) and concentrated using a Millipore concentrator. The flow rates of AKTA Purifier for sample loading, washing and elution were all 1 mL/min. The protein concentration was measured based on Lambert-Beer Law and the extinction coefficient was determined

---

50 using the ExPASy ProtParam tool.

51

#### 52 **4. Kinetics assay of fluorinase**

53 For determining the kinetics of fluorinase for SAM, the fluorinase (14.0 mM) was incubated at various  
54 concentrations of SAM (from 0 to 800  $\mu$ M) and a saturating concentration of KF (200 mM) in 20 mM  
55 phosphate buffer (pH 7.8) at various time points. The reaction temperature was 37°C. Similarly, for  
56 determining the kinetics of fluorinase for KF, the fluorinase (15.5  $\mu$ M) was incubated at various  
57 concentrations of KF (from 0 to 30 mM) and a saturating concentration of SAM (500  $\mu$ M) in 20 mM  
58 sodium phosphate buffer (pH 7.8) at various time points. All reactions were quenched by addition of  
59 200  $\mu$ L 10% trichloroacetic acid (TCA). All reactions were centrifuged (14000  $\times$  g, 10 min at 4°C) to  
60 remove the precipitated protein. The samples were further filtered using a 0.22  $\mu$ M Waterman filter  
61 membrane and subjected to HPLC analysis. The level of 5'-FDA production was determined against a  
62 standard curve of 5'-FDA. All experiments were performed in triplicate. Kinetic parameters were  
63 obtained by least-square fitting of the initial velocity against substrate concentrations based on  
64 Michaelis-Menten equation using GraphPad Prism 5.

65

#### 66 **5. Verification of fluorinase**

67 *Streptomyces xinghaiensis* fluorinase activity was tested at 37°C by monitoring 5'-FDA production  
68 using analytical HPLC. Assays were performed at 37°C for 10 min in 100  $\mu$ L of 20 mM sodium  
69 phosphate buffer (pH 7.8), 400  $\mu$ M SAM, 0.5 mg/mL purified protein, 200 mM KF. Reactions were  
70 quenched by 200  $\mu$ L 10% trichloroacetic acid (TCA) and then centrifuged (14000  $\times$  g, 10 min) to  
71 obtain the supernatant. The supernatant was further filtered using a 0.22  $\mu$ M Waterman filter and  
72 subjected to analytical HPLC or LC-MS analysis.

73

#### 74 **6. Verification of chlorinase activity**

75 Assays were performed as same as previously described for verification of fluorinase, but additional  
76 L-amino acid oxidase (Sigma-Aldrich) was added in the reaction mixture with concentration at 0.5  
77 mg/mL for the purpose of pushing the reaction forward. Reactions were incubated at 37°C for 60 to  
78 180 min, quenched by addition of 200  $\mu$ L 10% trichloroacetic acid (TCA). The supernatant was  
79 obtained by centrifugation, which was filtered and subjected to HPLC or LC-MS analysis.

80

#### 81 **7. HPLC and LC-MS identification for 5'-FDA**

82 The supernatant was subjected to a 1260 infinity HPLC (Agilent Technologies) or a 6120 Quadrupole  
83 LC-MS (Agilent Technologies) analysis on an analytic ZORBAX SB-C18 column (4.6 $\times$ 150 mm, 5  
84  $\mu$ m). The mobile phases for HPLC were composed of water containing 0.05% trifluoroacetic acid (TFA)  
85 and CH<sub>3</sub>CN containing 0.05% TFA ; while the buffer for LC-MS was exactly the same apart from the  
86 fact that the both water and CH<sub>3</sub>CN buffer were void of TFA. The gradient applied for both HPLC and  
87 LC-MS was shown as follows: 5% CH<sub>3</sub>CN (with 0.05% trifluoroacetic acid) for 2 min, 5% to 25%  
88 CH<sub>3</sub>CN over 10 min and 25% CH<sub>3</sub>CN for 2 min, 25% to 50% CH<sub>3</sub>CN over 4 min and 50% CH<sub>3</sub>CN for  
89 2 min, 50% to 95% CH<sub>3</sub>CN over 3 min and 95% CH<sub>3</sub>CN for 2 min, 95% to 5% CH<sub>3</sub>CN over 3 min and  
90 5% CH<sub>3</sub>CN for 2 min at a flow rate of 1 mL/min under 260 nm UV spectral monitoring.

91

#### 92 **8. Circular dichroism**

93 Circular dichroism was executed with protein concentration at 1.5 mg/mL in 20 mM sodium phosphate

94 buffer (pH 7.8) using MOS-450 circular dichroism instrument (BioLogic) at ambient temperature.

95

### 96 **9. Analysis of protein stability under different conditions by thermal shift assay**

97 Thermal shift analysis of protein stability was carried out in the presence of SYPRO Orange dye using  
98 an Applied Biosystems StepOne™ Real-Time PCR (Life Technologies). Assays were performed in a  
99 25 µL reaction containing 3 µM fluorinase, 3 µM SYPRO Orange dye, in the presence and absence of 3  
100 µM relevant small molecule compounds. The ROX channel was chosen for fluorescence recording.  
101 When the fluorinase melted (experienced thermal denaturation), it was able to give rise enhanced  
102 fluorescence; thus, a graph of fluorescence intensity vs. temperature was plotted to calculate  $T_m$   
103 (melting temperature) values under different conditions. All experiments were performed in triplicate.

104

### 105 **10. pH, temperature and metal ion effect on the activity of fluorinase**

106 In order to find optimal pH value, a reaction mixture (100 µL) containing 200 mM KF, 0.4 mM SAM  
107 in 20 mM sodium acetate (pH 4.0-5.5), sodium phosphate (pH 6.0-7.0), Tris-HCl (pH 7.5-9.0), or  
108 Gly-sodium hydroxide (pH 9.5-10.0) buffer was prepared. The reaction was at 37°C for 10 min with  
109 fluorinase at 0.5 mg/mL. The supernatant of each reaction was then subjected to HPLC analysis. Effect  
110 of temperature on fluorinase activity was performed in 20 mM Tris-HCl buffer (pH 7.8) and at varied  
111 temperature. To measure the metal ion effects on the activity, a group of 100 µL reaction mixtures  
112 containing 200 mM KF, 0.4 mM SAM in 20 mM Tris-HCl (pH 7.8) buffer were mixed with 1 mM  
113 different divalent metal chloride salts ( $Mg^{2+}$ ,  $Mn^{2+}$ ,  $Fe^{2+}$ ,  $Cu^{2+}$ ,  $Zn^{2+}$ ,  $Ca^{2+}$ ,  $Ni^{2+}$  and  $Sn^{2+}$ ) respectively  
114 or 1 mM EDTA (to remove the potential associated metal ions of the reaction). No metal ions nor  
115 EDTA was added in the 'control' reaction. The relative fluorinase activity was reflected by the  
116 production of 5'-FDA, which can be monitored by HPLC and quantified based on a standard curve of  
117 5'-FDA. All experiments were performed in triplicate.

118

### 119 **11. Protein stability at room temperature**

120 The purified fluorinase was maintained at 25°C for 0 day, 1 day, 2 days, 3 days and 4 days respectively.  
121 Then assays were executed at 37°C for 10 min in 100 µL reaction containing 50 mM Tris-HCl buffer  
122 (pH 7.0), 400 µM SAM, 200 mM KF and 0.5 mg/mL fluorinase. Reactions were quenched by addition  
123 of 200 µL 10% trichloroacetic acid. The samples were further processed for HPLC analysis. The  
124 enzyme activity can be reflected by the production of 5'-FDA. All experiments were performed in  
125 triplicate.

126

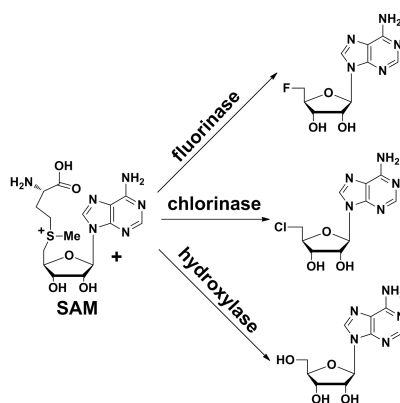

127

128

**Fig. S1. A comparison of fluorinase, chlorinase and duf-62 enzymes.**

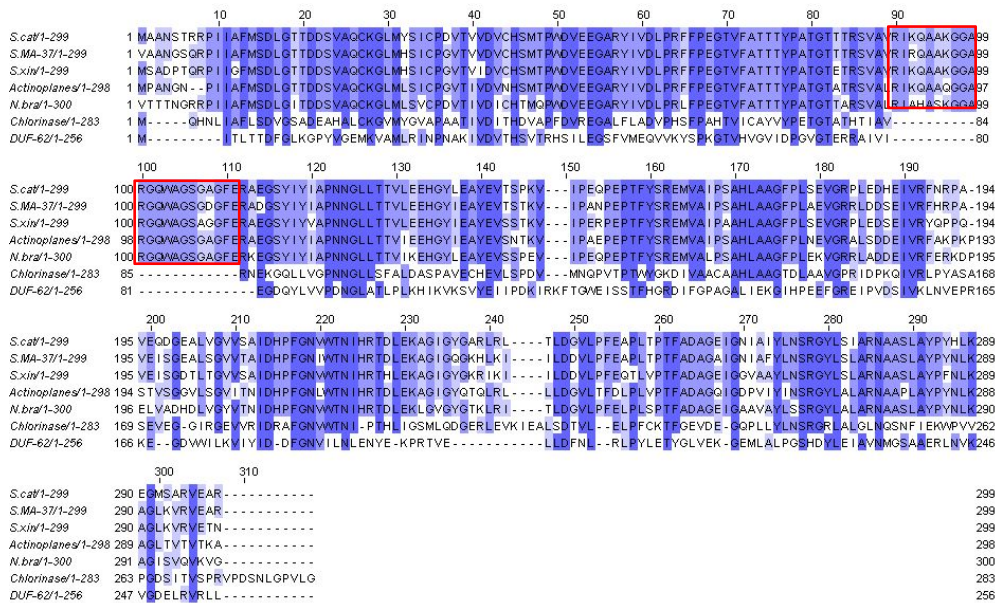

129

130 **Fig. S2. Amino acid alignment of the known fluorinases and other related proteins generated by**  
 131 **Jalview.<sup>2</sup> *S.cat*, *S.MA-37*, *S.xin*, *Actinoplanes* and *N.bra* denoted the fluorinases from *Streptomyces***  
 132 ***cattleya*, *Streptomyces* sp. MA37, *Streptomyces xinghaiensis* NRRL B-24674, *Actinoplanes* sp.**  
 133 **N902-109 and *Nocardia brasiliensis* respectively.<sup>3</sup> Chlorinase is from the marine actinomycete**  
 134 ***Salinospora tropica*.<sup>4</sup> SAM hydroxide adenosyltransferase (*duf-62*) from *Pyrococcus horikoshii*.<sup>5</sup> The**  
 135 **diagnostic characteristic of fluorinases to chlorinase and *duf-62* enzymes is the boxed 22 amino acid**  
 136 **loop.**

137

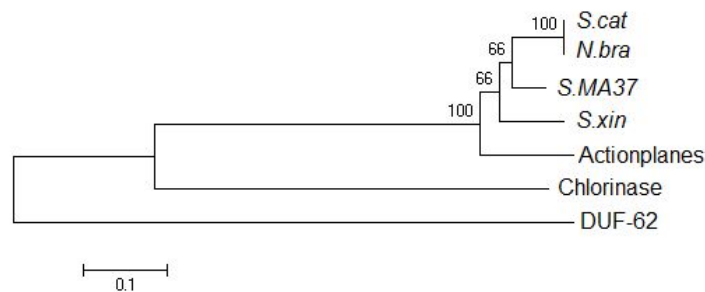

138

139 **Fig. S3. Phylogenetic tree of some functionally related enzymes in terms of protein sequences**  
 140 **generated by MEGA software.<sup>6</sup>**

141

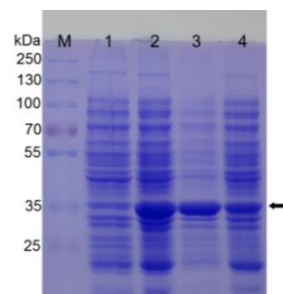

142

143 **Fig. S4. SDS-PAGE showing the over-expression of fluorinases by BL21(DE3). 1: no IPTG; 2:**  
 144 **IPTG induction; 3: insoluble fraction of over-expression; 4: soluble fraction of over-expression. The**  
 145 **over-expressed fluorinase was indicated by an arrow.**

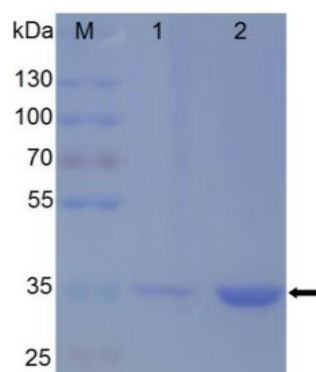

146  
147  
148  
149

**Fig. S5. SDS-PAGE showing purified fluorinase.** 1: loaded purified sample; 2: over-loaded sample. The purified fluorinase was indicated by an arrow.

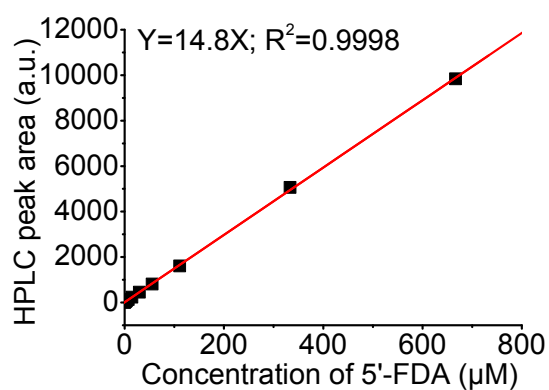

150  
151  
152  
153

**Fig. S6. Standard curve of 5'-FDA HPLC peak area against 5'-FDA concentration (µM).**

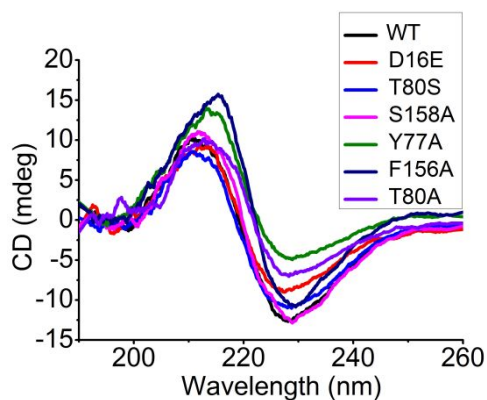

154  
155  
156

**Fig. S7. CD spectra of wild type and mutated fluorinases to monitor secondary structures.**

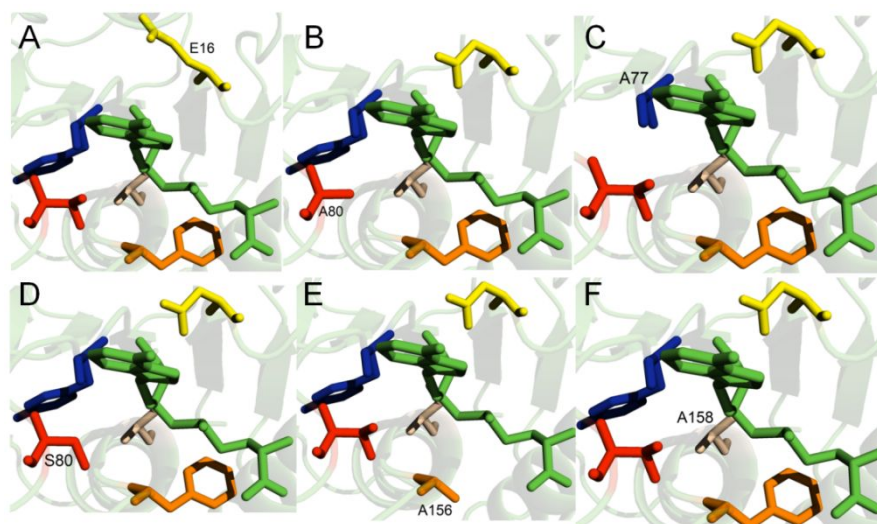

157  
158  
159  
160

**Fig. S8. Wild type and mutated *S. Xinghaiensis* fluorinase.** A: D16E; B: T80A ; C: Y77A; D:T80S; E: F156A; F: S158A.

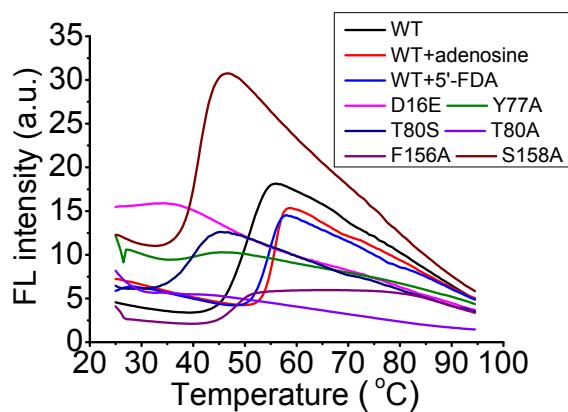

161  
162  
163  
164  
165

**Fig. S9. Melting profile of wild-type, mutant and small molecule complexed fluorinases in 50 mM Tris-HCl buffer (pH 7.0).**

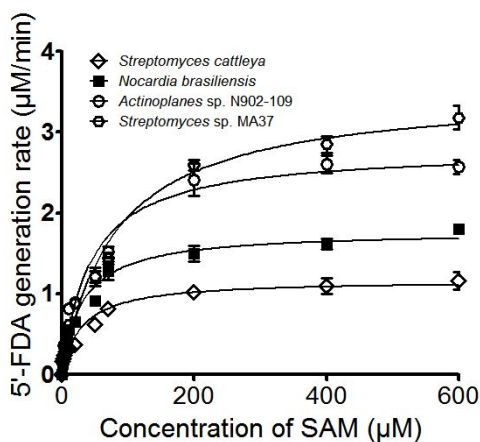

166  
167  
168  
169

**Fig. S10. Initial generation rate of 5'-FDA vs [SAM] for fluorinases from different sources.**

| Samples | Primers                                                                                                                |
|---------|------------------------------------------------------------------------------------------------------------------------|
| WT      | F: 5' -GGAATTCATGTCTGCGGACCCGACCCAG-3'<br>R: 5' -CCCAAGCTTAGTTGGTTTCAACACGAACTTTC -3'                                  |
| D16E    | F <sub>m</sub> : 5' -GGAATTCATGTCTGCGGACCCGACCCAGCGCCCGATC<br>ATTGGCTTCATGTCTGAACTGGGCACTACCGACGACTCCG-3'              |
| Y77A    | F <sub>m</sub> : 5' -GCGACCACCACCGCCCCGGCGACCCG-3'<br>R <sub>m</sub> : 5' -TCAGTACCGGTTCGCCGGGGCGGTGGTGG-3'            |
| T80S    | F <sub>m</sub> : 5' -CTACCCGGCGAGCGGTACTGAAACC-3'<br>R <sub>m</sub> : 5' -TACGGGTTTCAGTACCGCTCGCCGG-3'                 |
| F156A   | F <sub>m</sub> : 5' -CGGAACCGACTGCATATTCTCGTGAAATGG-3'<br>R <sub>m</sub> : 5' -CGCAACCATTTACGAGAATATGCAGTCGG-3'        |
| S158A   | F <sub>m</sub> : 5' -CGACTTTCTATTCTCGTGAAATGGTTGCGATCC-3'<br>R <sub>m</sub> : 5' -CCATTTACGAGCATAGAAAGTCGGTTCCGGACG-3' |
| T80A    | F <sub>m</sub> : 5' -CTACCCGGCGGCCGGTACTGAAACC-3'<br>R <sub>m</sub> : 5' -TACGGGTTTCAGTACCGGCCCGCCGG-3'                |

170  
171  
172 **Tab. S1. All primers used for generation of mutant fluorinases.**

| Samples                                 | T <sub>m</sub> (°C)      |
|-----------------------------------------|--------------------------|
| WT (50 mM Tris-HCl, pH 7.0)             | 50.9 ± 1.35              |
| WT + Adenosine (50 mM Tris-HCl, pH 7.0) | 55.5 ± 0.80              |
| WT + 5'-FDA (50 mM Tris-HCl, pH 7.0)    | 54.6 ± 1.20              |
| D16E (50 mM Tris-HCl, pH 7.0)           | Not able to determine    |
| Y77A (50 mM Tris-HCl, pH 7.0)           | 41.1 ± 0.39              |
| T80S (50 mM Tris-HCl, pH 7.0)           | 40.5 ± 2.31              |
| T80A (50 mM Tris-HCl, pH 7.0)           | Not able to be determine |
| F156A (50 mM Tris-HCl, pH 7.0)          | 49.0 ± 1.03              |
| S158A (50 mM Tris-HCl, pH 7.0)          | 41.3 ± 0.41              |

173  
174  
175 **Tab. S2. Calculated T<sub>m</sub> values of samples pictured on Fig. S9.**

| Samples                              | T <sub>m</sub> (°C) |
|--------------------------------------|---------------------|
| WT (50 mM Tris-HCl, pH 7.0)          | 50.5 ± 0.65         |
| WT (50 mM Tris-HCl, pH 7.5)          | 44.3 ± 0.42         |
| WT (50 mM Tris-HCl, pH 8.0)          | 43.3 ± 1.19         |
| WT (50 mM Tris-HCl, pH 8.5)          | 46.5 ± 1.13         |
| WT (100 mM phosphate buffer, pH 6.0) | 43.3 ± 0.30         |
| WT (100 mM phosphate buffer, pH 6.5) | 43.5 ± 0.24         |
| WT (100 mM phosphate buffer, pH 7.0) | 44.2 ± 0.55         |

176  
177  
178  
179 **Tab. S3. Calculated T<sub>m</sub> values of *Streptomyces xinghaiensis* fluorinase in different buffers.**

- 
- 180 **References:**  
181 1. K. L. Heckman and L. R. Pease, *Nat. Protoc.*, 2007, **2**, 924-932.  
182 2. A. M. Waterhouse, J. B. Procter, D. M. A. Martin, M. Clamp and G. J. Barton, *Bioinformatics*, 2009,  
183 **25**, 1189-1191.  
184 3. H. Deng, L. Ma, N. Bandaranayaka, Z. Qin, G. Mann, K. Kyeremeh, Y. Yu, T. Shepherd, J. H.  
185 Naismith and D. O'Hagan, *ChemBioChem*, 2014, **15**, 364-368.  
186 4. A. S. Eustaquio, F. Pojer, J. P. Noel and B. S. Moore, *Nat. Chem. Biol.*, 2008, **4**, 69-74.  
187 5. H. Deng, S. A. McMahon, A. S. Eustáquio, B. S. Moore, J. H. Naismith and D. O'Hagan,  
188 *ChemBioChem*, 2009, **10**, 2455-2459.  
189 6. K. Tamura, D. Peterson, N. Peterson, G. Stecher, M. Nei and S. Kumar, *Mol. Biol. Evol.*, 2011, **28**,  
190 2731-2739.  
191  
192
